# Supplementary material
Source: HighWire-hosted journal article supplement (http://www.qdcxjkg.com/highwire/filestream/113847/field_highwire_adjunct_files/0/ERJ-00809-2012_Disclosures.pdf)
Supplement: ERJ-00809-2012_Disclosures.pdf [file ERJ-00809-2012_Disclosures.pdf]

**P. Ernst** has received speaker fees and has attended advisory boards for AstraZeneca, Boehringer Ingelheim, GlaxoSmithKline, Merck, Novartis, and Nycomed.

**S. Suissa** has received research grants from AstraZeneca, Boehringer Ingelheim and GlaxoSmithKline, and has participated in advisory board meetings and as speaker in conferences for AstraZeneca, Boehringer-Ingelheim, GlaxoSmithKline, Novartis, Pfizer and Merck.
